# Supplementary material
Source: PubMed Central journal article supplement (PMC7218746)
Supplement: bm9b01675_si_001.pdf [file bm9b01675_si_001.pdf]

## Supporting information

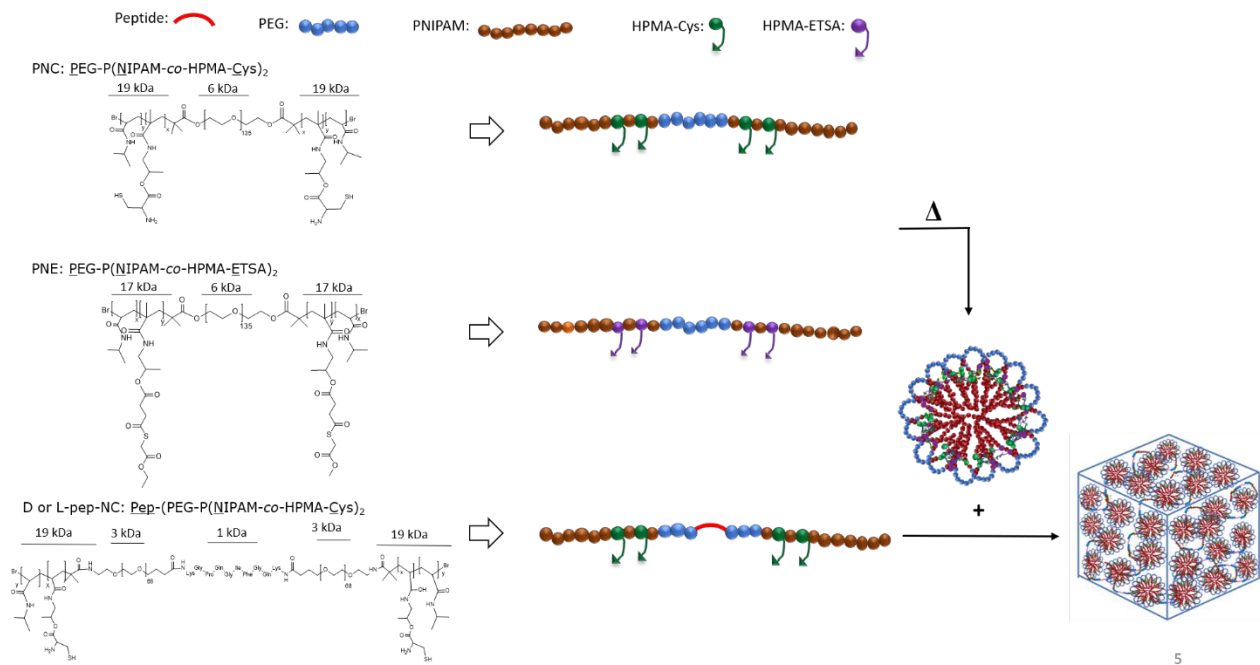

**SI-figure 1:** The structures of PNC, PNE, and Pep-NC. Core crosslinked flower-like micelles made from PNC and PNE linked via Pep-NC to yield a macroscopic hydrogel based on CCL crosslinked with an enzymatically cleavable spacer.

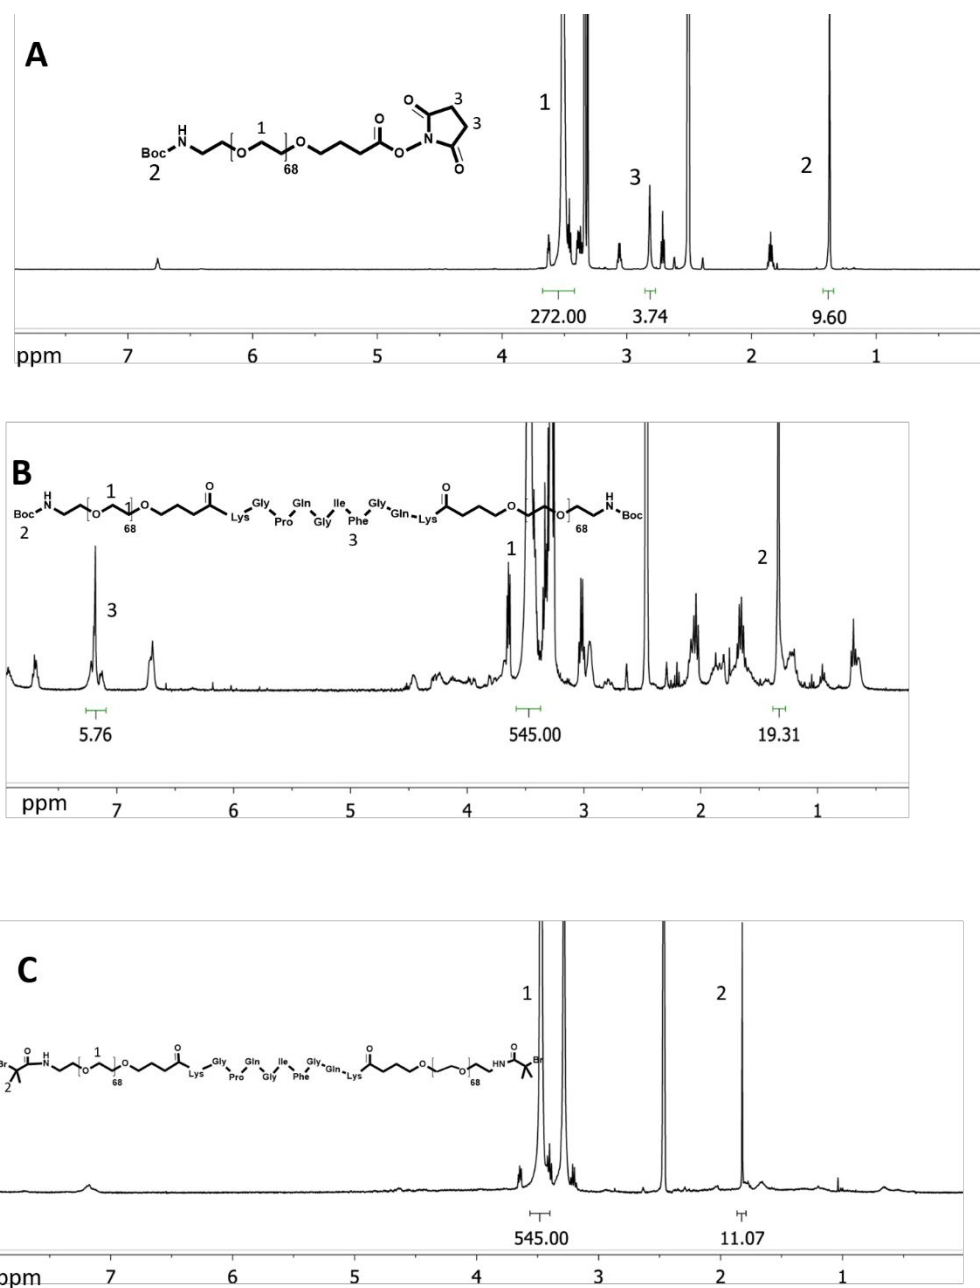

**SI-Figure 2:**  $^1\text{H-NMR}$  spectra of A) starting material of alpha-*t*-butyloxycarbonylamino- $\omega$ -carboxy succinimidyl ester poly(ethylene glycol) (Boc-NH-PEG-NHS) (PEG- $M_n$  3 kDa), B) L-Pep-PEG conjugate before deprotection of boc group, C) L-Pep-PEG ATRP macroinitiator. The integrations are normalized based on the number of hydrogens in the corresponding PEG molecules. Deuterated DMSO was used as solvent.

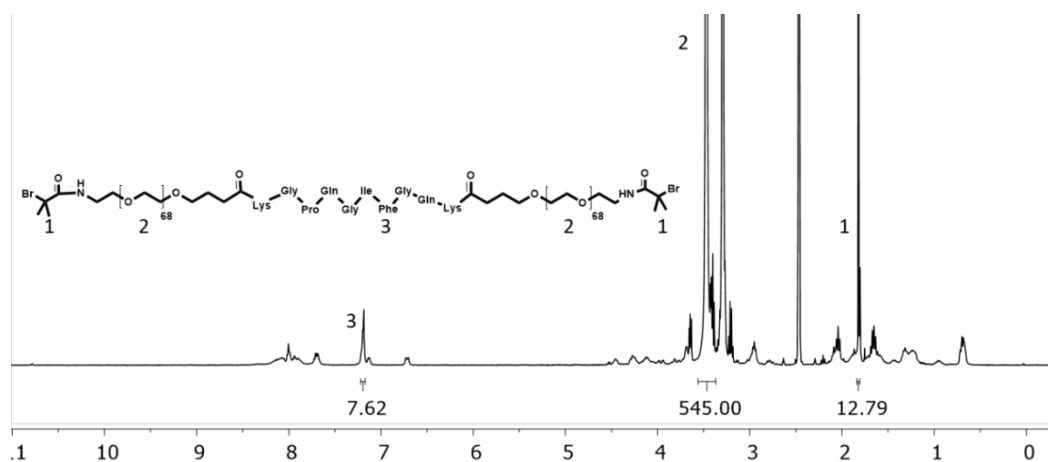

**SI-Figure 3:** <sup>1</sup>H-NMR spectrum of D-Pep-PEG ATRP macroinitiator. The integrations are normalized based on the number of hydrogens in the corresponding PEG molecules. Deuterated DMSO was used as solvent.

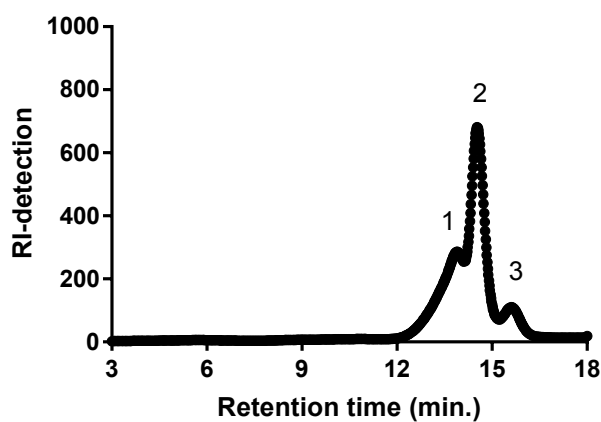

**SI-Figure 4:** GPC chromatogram of D-Pep-PEG ATRP macroinitiator in DMF containing 10 mM LiCl. Peak 1 corresponds to conjugation of peptide to the higher  $M_n$  PEG derivative present in the commercial starting compound 2 (see Fig. 1.), peak 2 confirms formation of PEG-D-Pep-PEG with a  $M_n$  of 7.9 kDa, and peak 3 belongs to non-conjugated PEG ( $M_n$ : 3.4 kDa).

A

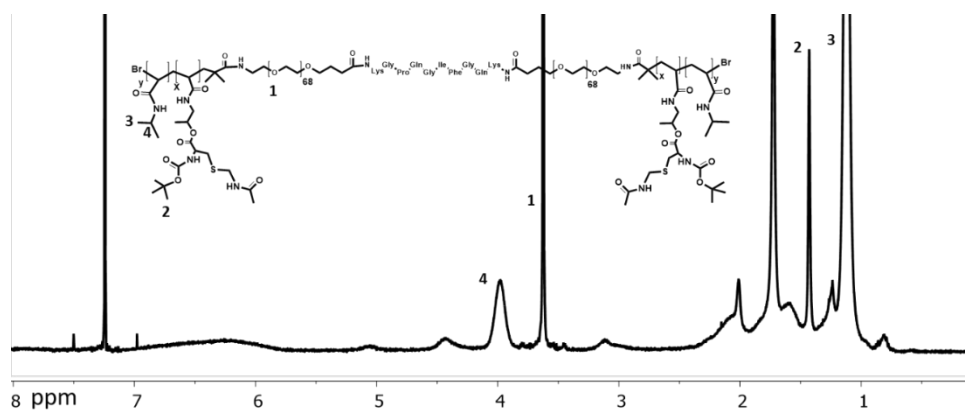

B

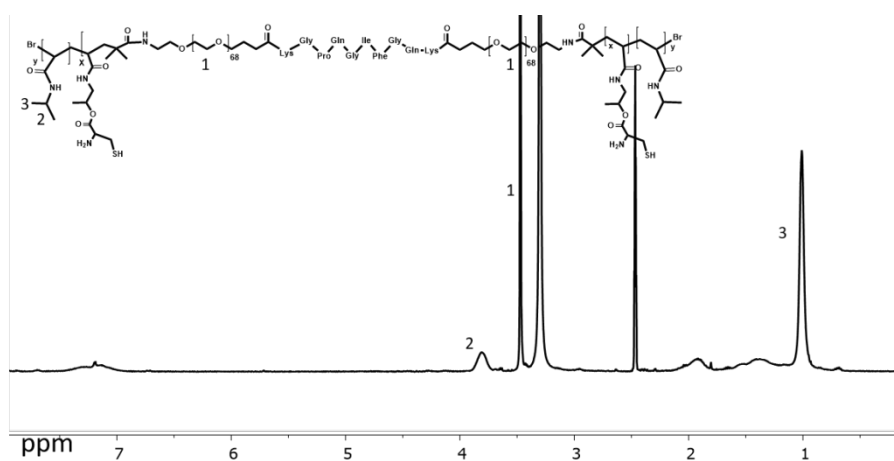

**SI-Figure 5:** A) <sup>1</sup>H-NMR spectrum of protected L-Pep-NC in CDCl<sub>3</sub>, B) <sup>1</sup>H-NMR spectrum of L-Pep-NC in deuterated DMSO.

A

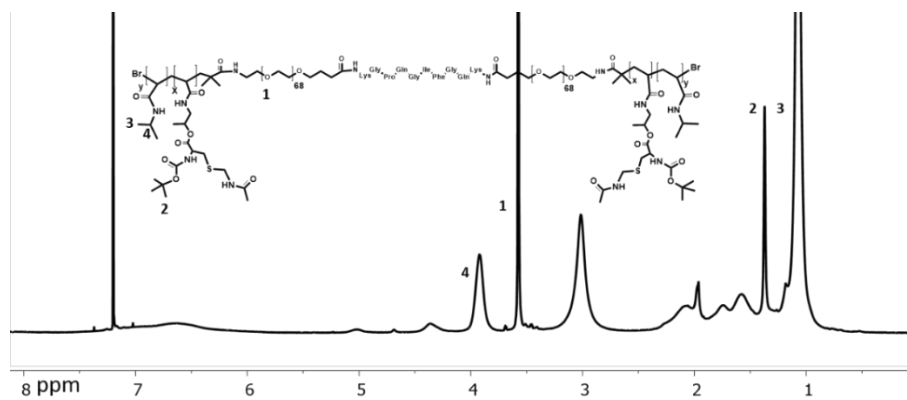

B

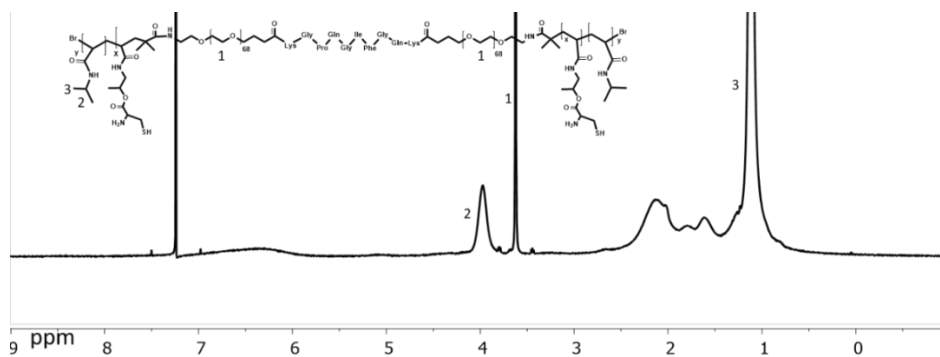

**SI-Figure 6:** A) <sup>1</sup>H-NMR spectrum of protected D-Pep-NC in CDCl<sub>3</sub> B) <sup>1</sup>H-NMR spectrum of D-Pep-NC in CDCl<sub>3</sub>.

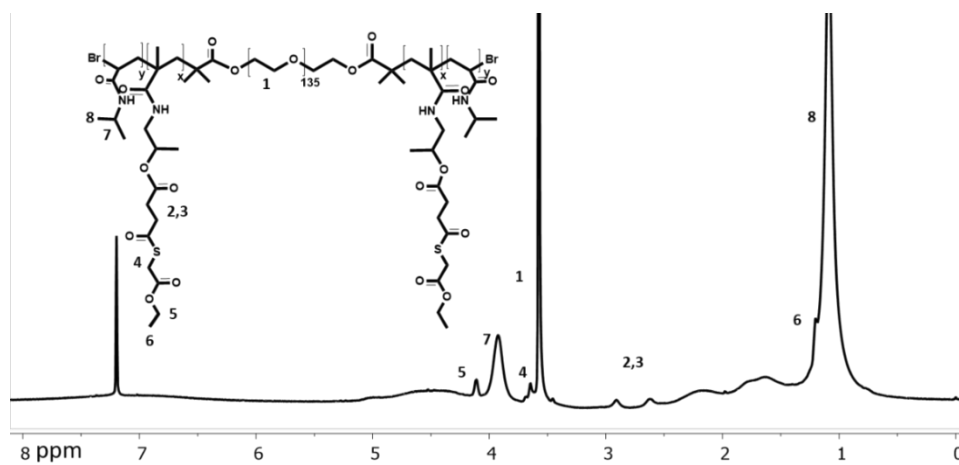

**SI-Figure 7:** <sup>1</sup>H-NMR spectrum of PNE in CDCl<sub>3</sub>.

A

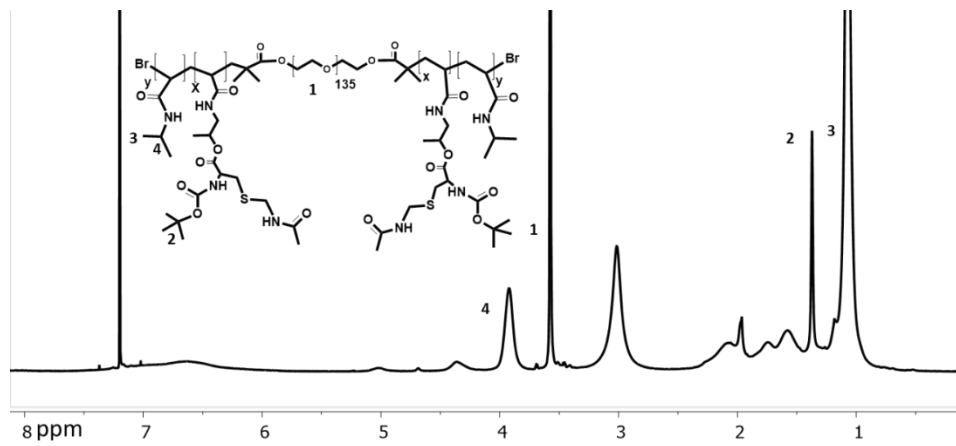

B

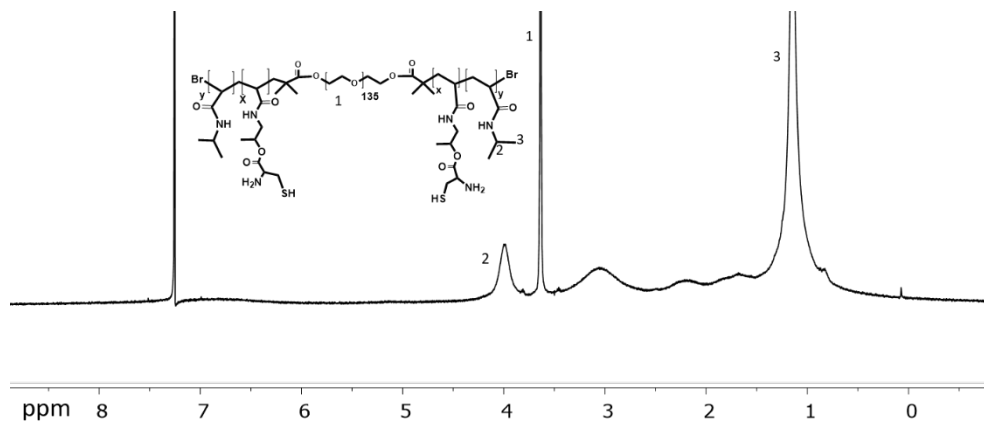

SI-Figure 8: A) <sup>1</sup>H-NMR spectrum of protected PNC in CDCl<sub>3</sub>, B) <sup>1</sup>H-NMR spectrum of PNC in CDCl<sub>3</sub>.

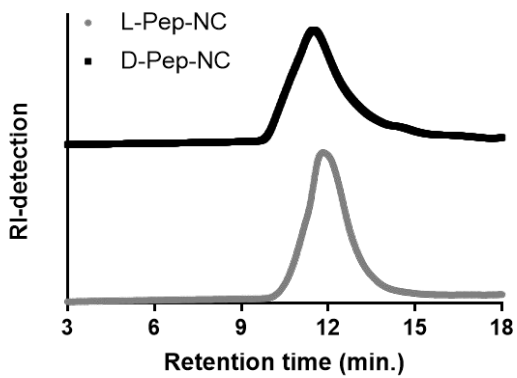

SI-Figure 9: GPC chromatogrammes of L-Pep-NC and D-Pep-NC in DMF containing 10 mM LiCl.

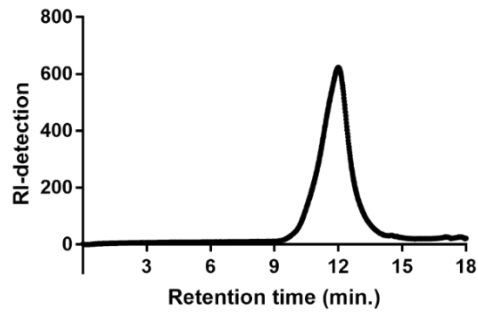

**SI-Figure 10:** GPC chromatogram of PNE in DMF containing 10 mM LiCl.

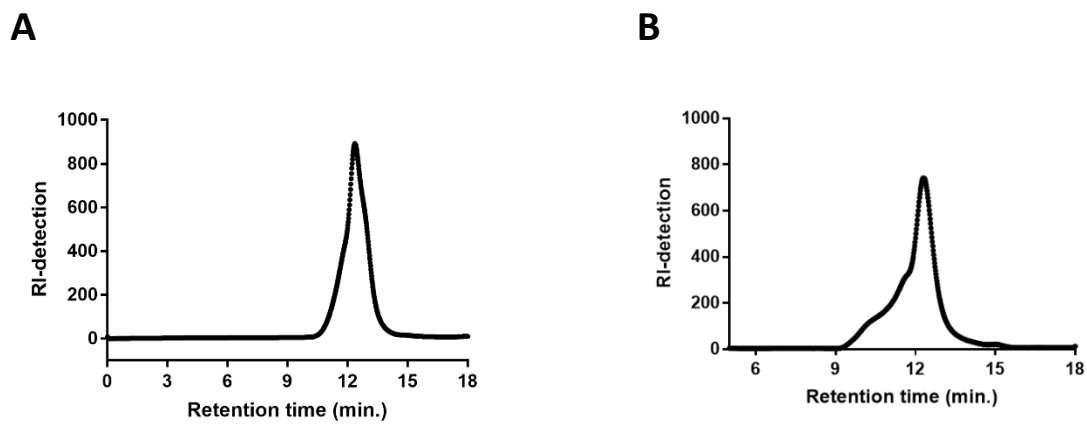

**SI-Figure 11:** GPC chromatograms of A) protected PNC B) PNC in DMF containing 10 mM LiCl.

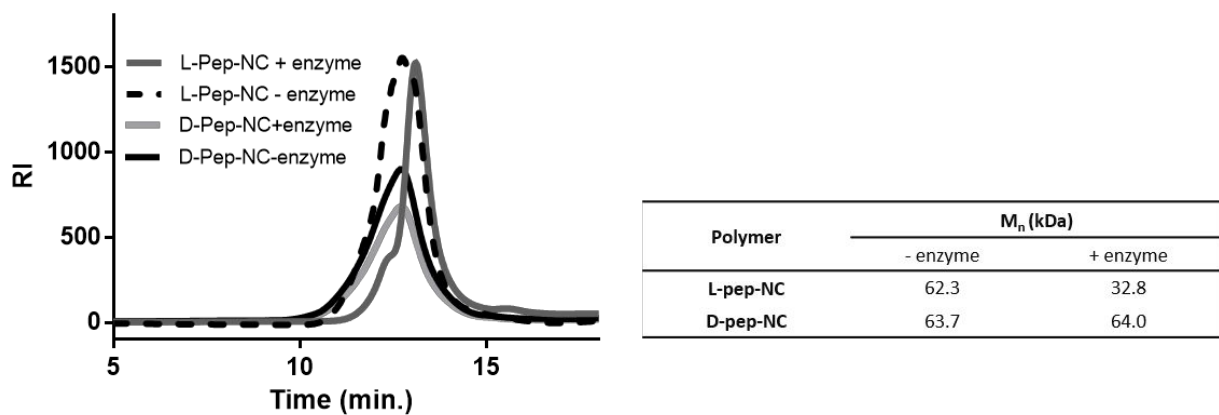

**SI-Figure 12:** GPC chromatograms of L-Pep-NC and D-Pep-NC before and after incubation with collagenase at a concentration of 30 units.mL<sup>-1</sup> for 24 hours at 37°C.

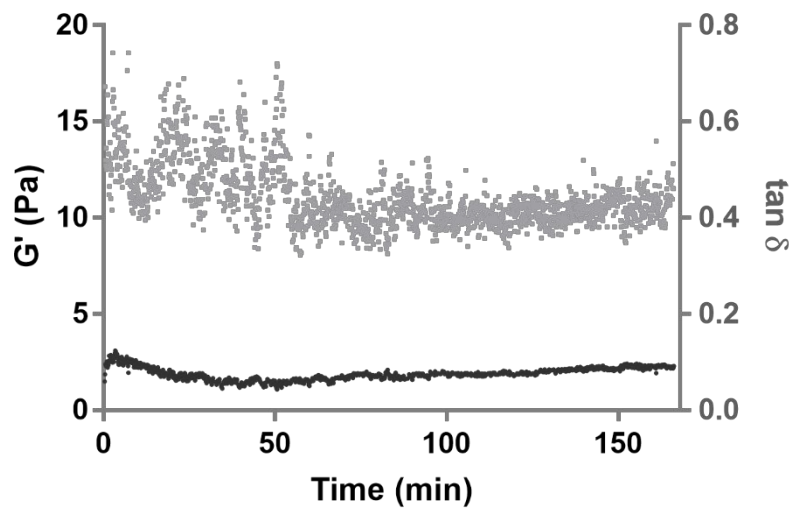

SI-figure 13: Storage modulus ( $G'$ ) and  $\tan \delta$  as a function of time for micelles at 37 °C.
